# Supplementary material for: Fecal metagenome and plasma metabolome analyses reveal changes in gut microbiota composition and plasma metabolites in rats with abemaciclib-induced diarrhea
Source: Research Square preprint supplement (doi:10.21203/rs.3.rs-6915822/v1), 2025-09-03
Supplement: Supplementary file 1 [file 80bcf2befafaa6f89aecdae3.docx]

**Application Format for Ethical Approval for Research Involving Animals**

Appl.Date: 10 August 2024

| **Program**:  Fecal Metagenome and Plasma  Metabolome Analyses Reveal Changes in Gut Microbiota Composition and Plasma Metabolites in Rats with  Abemaciclib-Induced Diarrhea | **Sponsor**:  The Outstanding Young Medical Technical and  Pharmaceutical Talents Development Program of the Healthcare System in Minhang District,Shanghai(No: mwyjyx16) |
| --- | --- |
| **Name** **of** **Principal** **Investigator**:  Ling Ye | **Department** :  Li Cao,Qiong Du,Rui Xu,Yu Han,Jiyong Liu |
| **Contact** **Person**: 2 | **Contact** **Tel:** 17318531967  **No.and** **Email)**:lingleaf@126.com |
| **Number** **of** **Implement**:2 | **Number** **of** **certificate**: 2 |
| **Name** **and** **certificate** **number,Description** **of** **experience/training/competency** **of** **the** **individuals** **carrying** **out** **the** **research: Jing Zhao,Xiaoxiao Fu** | |
| **Name** **and** **certificate** **number** **of** **the** **facility**:  SCXK (Zhe)2024-0004 | **Name** **and** **certificate** **number** **of** **the** **facility**: No |
| **Conformity** **of** **facility** **condition** **and** **proposed** **to** **carry** **out** **experiment** **requirement):**  Yes | |
| **Experimental** **period:**  10 August 2024-30 August 2024 | |

| **Experimental** **objective,necessity** **and** **significance**:  Abemaciclib,a cyclin-dependent kinase 4 and 6 inhibitor,has been approved for use in combination with endocrine therapy to treat hormone receptor-positive(HR+)/human epidermal growth factor receptor 2-negative(HER2-)early and advanced breast cancer.Abemaciclib has demonstrated  significant efficacy in pro longing overall survival in the treatment of metastatic breast cancer. However,similar to other cancer therapies,abemaciclib is associated with various side effects, particularly gastrointestinal toxicity.Notably,approximately 80%?90%of patients experience  diarrhea as a common adverse reaction to abemaciclib.Abemaciclib induced diarrhea commonly  occurs within 6?8 days of treatment initiation [8].If not effectively managed,it can potentially lead to malnutrition,fatigue,and elec trolyte imbalances,and dose adjustments or discontinuation of  treatment may also be required,which undoubtedly decrease the quality of life(QOL)and reduce treatment adherence.Therefore,elucidating the mechanism underlying abemaciclib-induced  diarrhea is crucial for developing effective management strategies to improve patient outcomes and enhance treatment adherence. | | | |
| --- | --- | --- | --- |
| **How** **the** **program** **has** **been** **designed** **to** **achieve** **the** **objectives** **of** **the** **research**:  Female rats were ran domly divided into abemaciclib(orally administered abemaciclib,n=11)and control (orally administered 0.9%saline,n=6)groups.When the rats reached grade 3 diarrhea,  the jejunum,ileum,and colon tissues were collected for his tological analysis to assess intestinal mucosal damage.Rat feces were obtained 1 for metagenomic analysis to analyze changes in the  gut microbial composi tion. | | | |
| **Animal to be used** | **Animal** **origin/Certificate** **number**: | | **Certification** **of** **fitness**:  **☑Yes**  **□No** |
| **☑** | **Shanghai SLAC Laboratory Animal Co., Ltd.**  SCXK（hu）2022-0004 |
| □ | **Shanghai Lingchang Biotechnology Co., Ltd.**  SCXK（hu）2018-0003 |
| □ | **Shanghai Model Organisms Center, Inc.**  SCXK（hu）2017-0010 |
| 口 | **Jiangsu GemPharmatech Co., Ltd.**  SCXK（su）2018-0008 | **Grade**:  口C V  口CL  ☑SPF  □GF  □Other |
| □ | **Shanghai SIPPR-BK Lab Animal Co., Ltd.**  SCXK（hu）2018-0006 |
| □ | Others： |

|  | **breed/strain:**  ☑rat □mice  □nude mice □rabbit  □ d o g □genetically modified animal | | |
| --- | --- | --- | --- |
| **Number:**  18 ♀； 0 ♂ | **Weight**: 238±10g | **Age** : 7-9weeks |
| **Reasons** **for** **the** **choice** **of** **species** **and** **numbers** **of** **animals** **to** **be** **used:**  1、**The reasons for selecting the gender of animals：**  The hormone levels in female rats,such as estrogen,may affect gastrointestinal function, thereby influencing the occurrence and development of diarrhea.In some cases,changes in hormone levels may exacerbate or alleviate the gastrointestinal side effects of drugs.  **2、The reasons for selecting specific traits in animal models：**  The physiological and anatomical structures of the gastrointestinal tract in rats are similar to those in humans,which makes rats an ideal model for studying gastrointestinal drug  responses.Through rat experiments,it is possible to better simulate the gastrointestinal side effects,such as diarrhea,that abemaciclib may cause in the human body.  **3、The necessity of justifying the number of animals used in experiments：**  A larger sample size in the experimental group increases the statistical power of the study.This means that the experiment is more likely to detect a true effect of abemaciclib on inducing diarrhea,if such an effect exists.While the control group is smaller than the experimental group,6 rats still provide a reasonable baseline for comparison.The control group helps to establish the normal range of gastrointestinal function in rats under the experimental conditions,without the influence of abemaciclib. | | |

|  |
| --- |

| **Detailed information of the experiments on animals** | **Description** **of** **the** **overall** **harms** **expected** **to** **be** **experienced** **by** **the** **animals** **-including** **details** **of** **the** **likely** a**dverse** **effects** **of** **each** **protocol,cage** **breeding** **and** **the** **steps** **which** **will** **be** **taken** **t**o **control** **these** **adverse** **effects.)**:  ☑ **Administration of drugs：**Abemaciclib  ☑ **Blood sampling：**  □ Take a biopsy (of living tissue)：  □ tail tip □ toes □ others：  Whether to administer anesthesia： ☑ No □Yes，The reasons:______________  □ surgery  Is anesthesia required? ☑ No □Yes，The reasons:______________  **Main** **observation** **target**  □Fur: Check for luster, piloerection, bleeding, dirt, and hair loss.  □Eyes: Check for the presence of eye discharge, tearing, cataracts, corneal injuries, etc.  □Mouth: Check for drooling, bleeding, etc.  □ Ears: Check for trauma, deformed ear pinna (or "folded ear pinna" if referring to a specific abnormal folding), otitis media, etc.  □Limbs: Check for trauma, deformity/bending (if specifying abnormal curvature), dislocation, swelling, arthritis, etc.  ☑Anus: Check for diarrhea, bloody stools, rectal prolapse, etc.  ☑Mental state and appetite: Symptoms such as silence, lethargy, sluggish movement, loss of appetite, and refusal to eat.  ☑Nutritional status: Emaciation, excessive obesity, abnormal growth.  □Posture and gait: Abnormal posture, difficulty in walking and standing, motor incoordination (or dyskinesia), limping, etc.  □The size of tumor growth  □The hair growth rate and hair morphology, the rate of skin wound healing, the appearance and thickness of the skin, the histological structure of the skin, and the expression of skin stem cell-related marker genes.  **Humane** **endpoint** **or** **experimental** **terminative** **indicator):**  The jejunum,ileum,and colon tissues of the rats were collected for histological analysis to assess intestinal mucosal damage.Rat feces were obtained under sterile conditions and stored at-80℃for metagenomic analysis.Fresh blood samples were collected from the rats via cardiac puncture using a 23-gauge needle in EDTA-anticoagulant vacuum tubes.Within 30 min of collection,the plasma was separated and stored at-80 for untargeted metabolomic analysis.  **Humane endpoint or experimental terminative indicator：**  The jejunum, ileum, and colon tissues of the rats were collected for histological analysis to assess intestinal mucosal damage. Rat feces were obtained under sterile conditions and stored at-80℃for metagenomic analysis. Fresh blood samples were collected from the rats via cardiac puncture using a 23-gauge needle in EDTA-anticoagulant vacuum tubes. Within 30 min of collection, the plasma was separated and stored at-80 for untargeted metabolomic analysis.  **Death conduct**  ☑ Cervical dislocation method  Carbon dioxide asphyxiation method  Excessive anesthetic (with explanation/description)  **Not for the death of the animal disposition：**  □ Continue to use  □ Save in the agency  □Release to the wild  □Others, detailed description  **Major measures for the 3Rs (Replacement, Reduction, Refinement):**  □ Utilize in vitro experiments with tumor cell lines to replace in vivo experiments as much as possible.  ☑ Minimize the number of animals used while ensuring that biological statistical significance can still be achieved.  □ Optimize experimental techniques and conditions, such as employing anesthesia techniques, to minimize harm and suffering to experimental animals.  **Poisonous (harmful) material(infection, radiate, chemical poison and other)being used）：**  ☑ no  □yes，Declare）：  **Supplementary instruction or any auxiliary documents for investigate）：**  None  **Declaration for the information disclosure and confidentiality requirements, declaring the information need to be kept secret ,the information can be disclosed.）：**  **Claiming jurors for being debarb**  None  **Declaration**  I will abide by the law and regulation stipulation, and accept the supervision and inspection by the committee and laboratory animal department  2.The information I have given is accurate, detailed and comprehensive.  Ling Ye  Declarant: Signature (stamp)of PI  Signature (stamp)of Director of animal experiment  2024Y 8 M 18 D  **Opinion of Veterinary of institution：**  Signature (stamp) Veterinary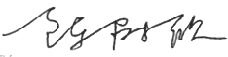  2024Y 8 M 10 D  **Opinion from laboratory animal facility：**  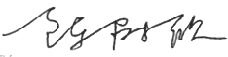  Signature (stamp)of the facility Director  2024Y 8 M 10 D  **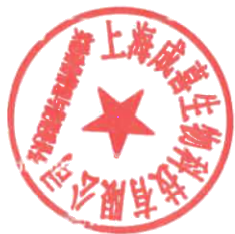Approval opinion of Committee：**  Inspection by members：  Agree： Disagree：  **Signature** (stamp)of Chairman of Committee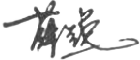  2024Y 8 M 10 D  **IACUC Issue No：CX05080406**8 |
| --- | --- |

Notice:Submitting the Application Format in duplicate and a electronic edition. The Appl.No.and IACUC Issue No.are make out by Jury.
